# Supplementary material for: Tumor Resection Recruits Effector T Cells and Boosts Therapeutic Efficacy of Encapsulated Stem Cells Expressing IFNβ in Glioblastomas
Source: Oxford University Press journal article supplement (doi:10.1158/1078-0432.ccr-17-0077), 2017-09-14
Supplement: 10780432ccr170077-sup-177065_3_supp_4230776_qv5mq0.pdf [file 10780432ccr170077-sup-177065_3_supp_4230776_qv5mq0.pdf]

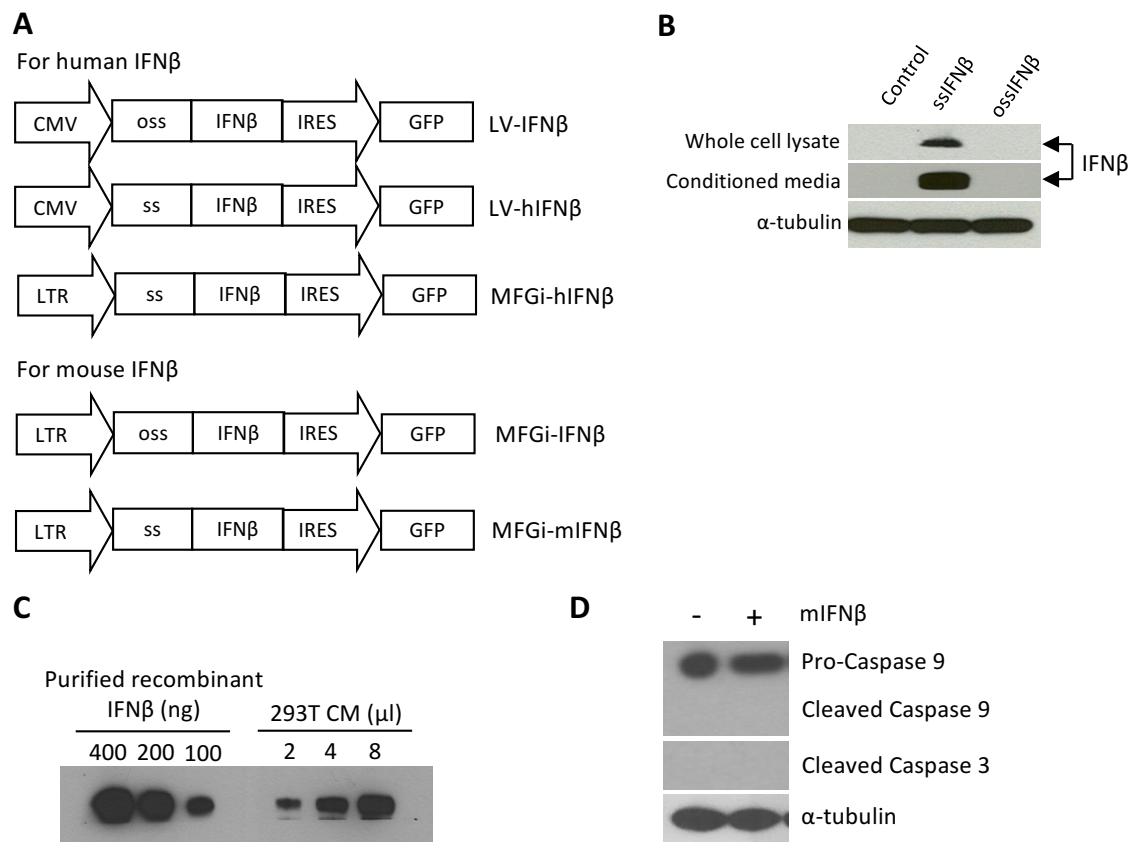

### Supplemental Figure 7. Engineering cells expressing secretory mouse and human IFN $\beta$ .

(A) Design of retroviral vector expressing secretable human and murine IFN $\beta$ . The complementary DNA of hIFN $\beta$  and mIFN $\beta$  was cloned after the CMV promoter in CSCGW lentiviral vector or after the LTR promoter in MFGi-GFP, which also bears an internal ribosomal entry site (IRES) and GFP. The signal sequence of IFN $\beta$  (oss) was replaced with that of Flt3 ligand (ss) to maximize secretion of mIFN $\beta$ . (B) HEK-293T cells were transfected by LV-GFP (control), lentiviral vectors expressing ssIFN $\beta$  (with Flt3L signal sequence) or ossIFN $\beta$  (with its endogenous signal sequence). Western blot analysis was performed to detect IFN $\beta$  from whole cell lysates and their conditioned medium. Conditioned medium was concentrated to equivalent volumes for each cell lysate. (C) To quantify the amount of IFN $\beta$  in conditioned medium, indicated amounts of conditioned medium from HEK-293T transfected with MFGi-hIFN $\beta$  (293T CM) were Western blotted and compared to purified recombinant human IFN $\beta$ , blotted in parallel. The concentration of hIFN $\beta$  in the conditioned medium was estimated by comparing hIFN $\beta$  band intensity to that of purified recombinant IFN $\beta$ . (D) Activation of Caspase 3 and Caspase 9 were checked by Western blot analysis on CT2A cell lysates collected 24 hours after treatment with mIFN $\beta$ .
