# Supplementary material for: Tumor Resection Recruits Effector T Cells and Boosts Therapeutic Efficacy of Encapsulated Stem Cells Expressing IFNβ in Glioblastomas
Source: Oxford University Press journal article supplement (doi:10.1158/1078-0432.ccr-17-0077), 2017-09-14
Supplement: 10780432ccr170077-sup-177065_3_supp_4230778_lxllly.pdf [file 10780432ccr170077-sup-177065_3_supp_4230778_lxllly.pdf]

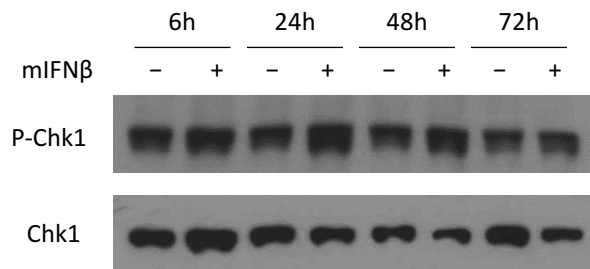

**Supplemental Figure 11. mIFN $\beta$  does not activate Chk1 in CT2A mouse GBM cells**

Time course western blot analysis of P-Chk1 (S345) in CT2A cells in response to mIFN $\beta$ . CT2A cell lysates collected 6, 24, 48 and 72hrs after treatment with mIFN $\beta$ .
