# Supplementary material for: Tumor Resection Recruits Effector T Cells and Boosts Therapeutic Efficacy of Encapsulated Stem Cells Expressing IFNβ in Glioblastomas
Source: Oxford University Press journal article supplement (doi:10.1158/1078-0432.ccr-17-0077), 2017-09-14
Supplement: 10780432ccr170077-sup-177065_3_supp_4230780_yxyy7p.pdf [file 10780432ccr170077-sup-177065_3_supp_4230780_yxyy7p.pdf]

**GBM4**

|              | 24 h         |                |             | 48 h         |                |             | 72 h             |                |             |
|--------------|--------------|----------------|-------------|--------------|----------------|-------------|------------------|----------------|-------------|
|              | <i>G0/G1</i> | <i>S(G2/S)</i> | <i>G2/M</i> | <i>G0/G1</i> | <i>S(G2/S)</i> | <i>G2/M</i> | <i>G0/G1</i>     | <i>S(G2/S)</i> | <i>G2/M</i> |
| Control      | 51.8         | 32.4           | 3.4         | 53.3         | 31.4           | 8.08        | 59.9             | 25.5           | 7.15        |
| hIFN $\beta$ | 47.3         | 44.5           | 1.98        | 29.1         | 51.8           | 4.01        | 19.5             | 70.4           | 3.6         |
|              |              |                |             |              |                |             |                  |                |             |
|              | 96 h         |                |             | 120 h        |                |             |                  |                |             |
|              | <i>G0/G1</i> | <i>S(G2/S)</i> | <i>G2/M</i> | <i>G0/G1</i> | <i>S(G2/S)</i> | <i>G2/M</i> | <i>apoptosis</i> |                |             |
| Control      | 66.2         | 21.7           | 7.15        | 68.5         | 24.1           | 5.27        | -                |                |             |
| hIFN $\beta$ | 11.0         | 75.6           | 3.45        | 16.2         | 58.4           | 2.6         | 11.7             |                |             |

**Supplemental Figure 10. Cell cycle response of GBM4 to hIFN $\beta$** 

Cell cycle analysis of GBM4 treated with hIFN $\beta$  conditioned medium for various times and followed by a 1 hr BrdU pulse. Cells were stained with anti-BrdU and counterstained with propidium iodide (PI) and analyzed by flow cytometry. Tables shows the breakdown of cell cycle phases in control and treated groups of GBM4 over time.
