# Supplementary material for: Tumor Resection Recruits Effector T Cells and Boosts Therapeutic Efficacy of Encapsulated Stem Cells Expressing IFNβ in Glioblastomas
Source: Oxford University Press journal article supplement (doi:10.1158/1078-0432.ccr-17-0077), 2017-09-14
Supplement: 10780432ccr170077-sup-177065_3_supp_4230781_pv5mq0.pdf [file 10780432ccr170077-sup-177065_3_supp_4230781_pv5mq0.pdf]

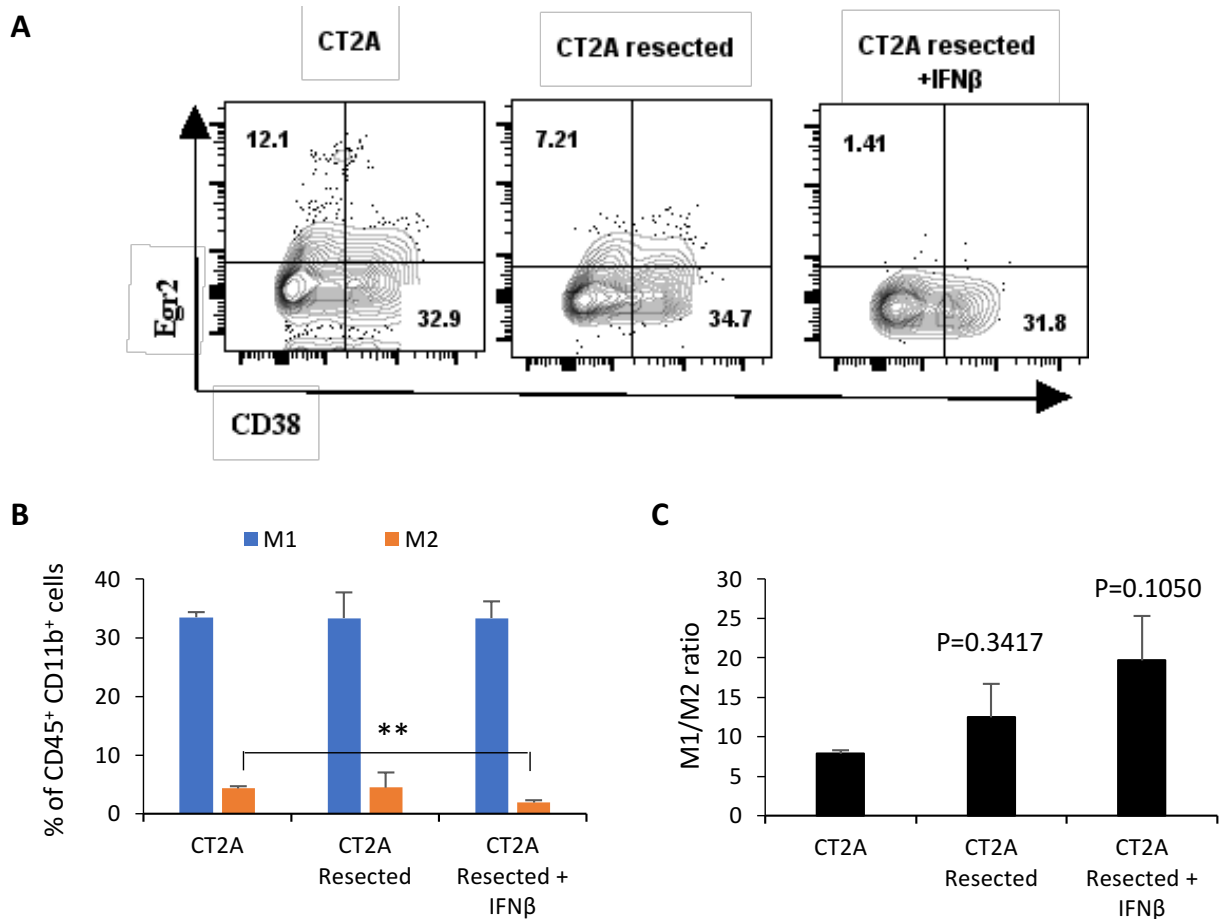

**Supplemental Figure 6. Flow cytometry analysis of M1/M2 macrophage polarization post tumor resection and IFN $\beta$  treatment in CT2A tumor bearing mouse brains**

Flow cytometry analysis of mono nuclear cells isolated from whole brains of indicated treatment groups 5 days post-tumor resection (3 mice/group). Mononuclear cells were stained with antibodies against surface molecules-CD45, CD11b and CD38 and counter-stained post fixation and permeabilisation with intracellular marker Egr2. (A) Representative flow data from indicated groups were shown. (B) comparison of M1 (CD38<sup>+</sup> CD45<sup>+</sup> CD11b<sup>+</sup> cells) and M2 (Egr2<sup>+</sup> CD45<sup>+</sup> CD11b<sup>+</sup> cells) macrophage polarization after tumor resection and IFN $\beta$  treatment. (C) The ratio of M1:M2 macrophage (P values were obtained from unpaired t test with CT2A tumor group)
