# Supplementary material for: Tumor Resection Recruits Effector T Cells and Boosts Therapeutic Efficacy of Encapsulated Stem Cells Expressing IFNβ in Glioblastomas
Source: Oxford University Press journal article supplement (doi:10.1158/1078-0432.ccr-17-0077), 2017-09-14
Supplement: 10780432ccr170077-sup-177065_3_supp_4230783_jv5mq0.pdf [file 10780432ccr170077-sup-177065_3_supp_4230783_jv5mq0.pdf]

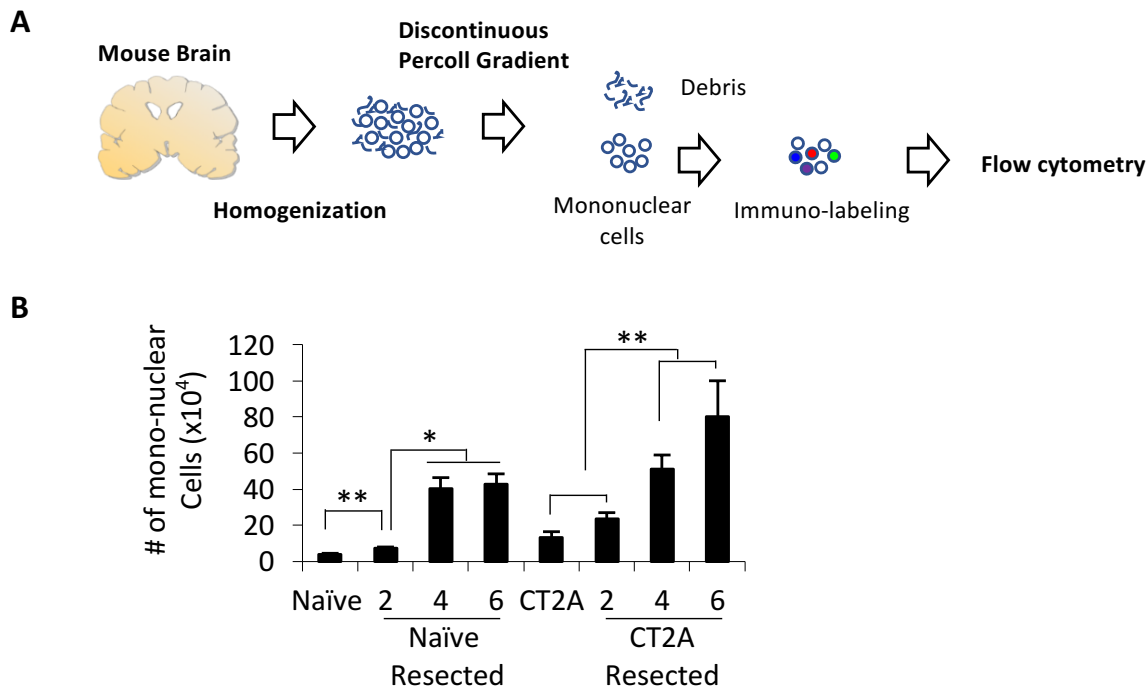

**Supplemental Figure 3. Flow cytometry analysis of immune cell population in CT2A tumor bearing mouse brains**

(A) Scheme of flow cytometry analysis of mono nuclear cells isolated from whole brains from different treatment groups (3 mice/group). Cells were stained with antibodies recognizing CD45, CD11b, Gr-1, CD11c, CD4 and CD8, and analyzed by flow cytometry. (B) The number of mononuclear cells isolated from mouse brains of experimental groups (n=3/group).
