# Supplementary material for: Tumor Resection Recruits Effector T Cells and Boosts Therapeutic Efficacy of Encapsulated Stem Cells Expressing IFNβ in Glioblastomas
Source: Oxford University Press journal article supplement (doi:10.1158/1078-0432.ccr-17-0077), 2017-09-14
Supplement: 10780432ccr170077-sup-177065_3_supp_4230786_vv5mq1.pdf [file 10780432ccr170077-sup-177065_3_supp_4230786_vv5mq1.pdf]

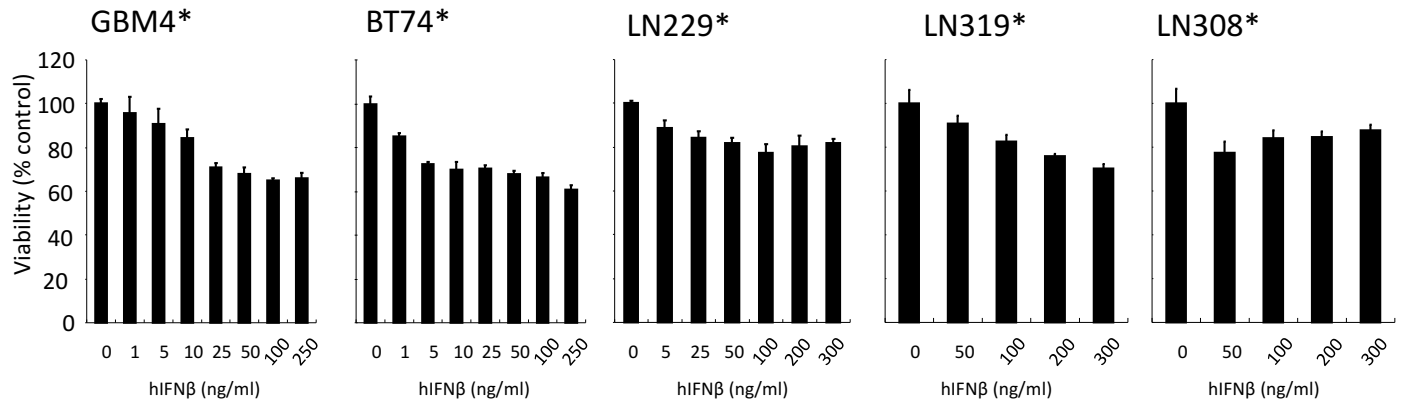

**Supplemental Figure 9. Cell viability of human GBM cells in response to different doses of hIFNβ**  
 Cell viability was measured using a Celltiter Glow assay in a panel of GBM lines. GBM lines were incubated for 72 hrs with indicated concentrations of hIFNβ from HEK-293T conditioned medium.  $P < 0.01$  (\*) between control versus IFNβ at 100 ng/ml ( $n=3$ , unpaired student t-test). Data are mean  $\pm$  s.d.
