# Supplementary material for: Tumor Resection Recruits Effector T Cells and Boosts Therapeutic Efficacy of Encapsulated Stem Cells Expressing IFNβ in Glioblastomas
Source: Oxford University Press journal article supplement (doi:10.1158/1078-0432.ccr-17-0077), 2017-09-14
Supplement: 10780432ccr170077-sup-177065_3_supp_4230791_9v5mq2.pdf [file 10780432ccr170077-sup-177065_3_supp_4230791_9v5mq2.pdf]

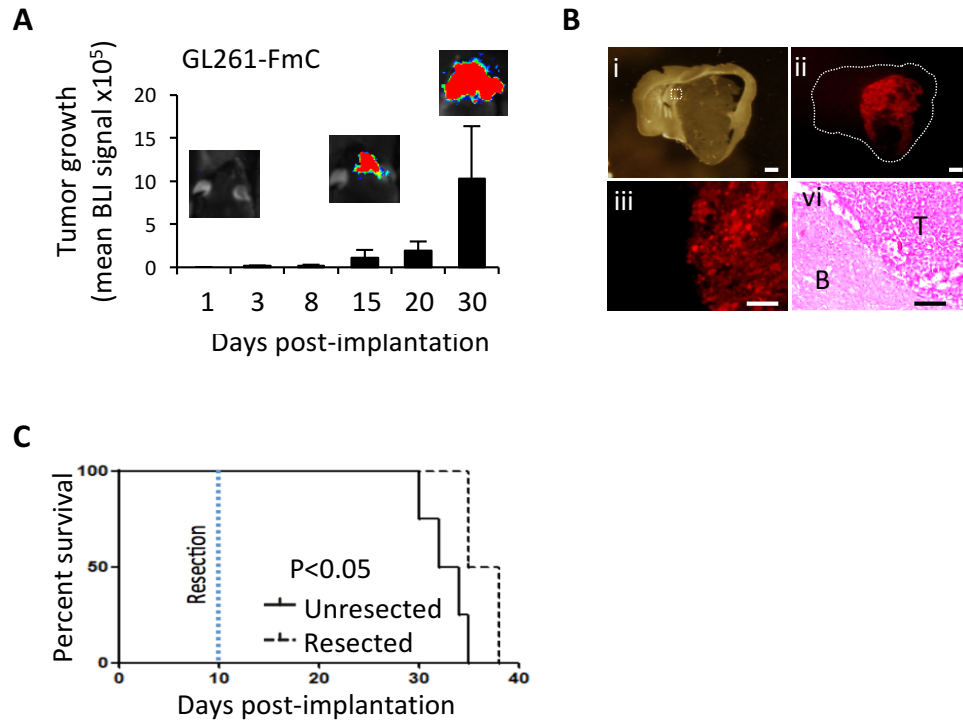

**Supplemental Figure 2. Establishment of mouse model of GL261 tumor resection.**

(A) Tumor growth was monitored by bioluminescent imaging in mice bearing intracranial GL261-FmC cells (n=4). (B) Photomicrographs of coronal brain sections bearing an established GL261 -FmC tumor; (i) light micrograph; (ii) fluorescence micrograph of tumor; (iii) high magnification of tumor of inlet in (i); (iv) hematoxylin and eosin (H& E) staining. T = tumor; B = brain. Scale bars, 400  $\mu$ m (i, ii), 100  $\mu$ m (iii, iv) (D) Kaplan-Meier survival curves of mice with and without resected GL261--FmC tumors.  $P < 0.05$
