# Supplementary material for: Tumor Resection Recruits Effector T Cells and Boosts Therapeutic Efficacy of Encapsulated Stem Cells Expressing IFNβ in Glioblastomas
Source: Oxford University Press journal article supplement (doi:10.1158/1078-0432.ccr-17-0077), 2017-09-14
Supplement: 10780432ccr170077-sup-177065_3_supp_4230792_kv5mq2.pdf [file 10780432ccr170077-sup-177065_3_supp_4230792_kv5mq2.pdf]

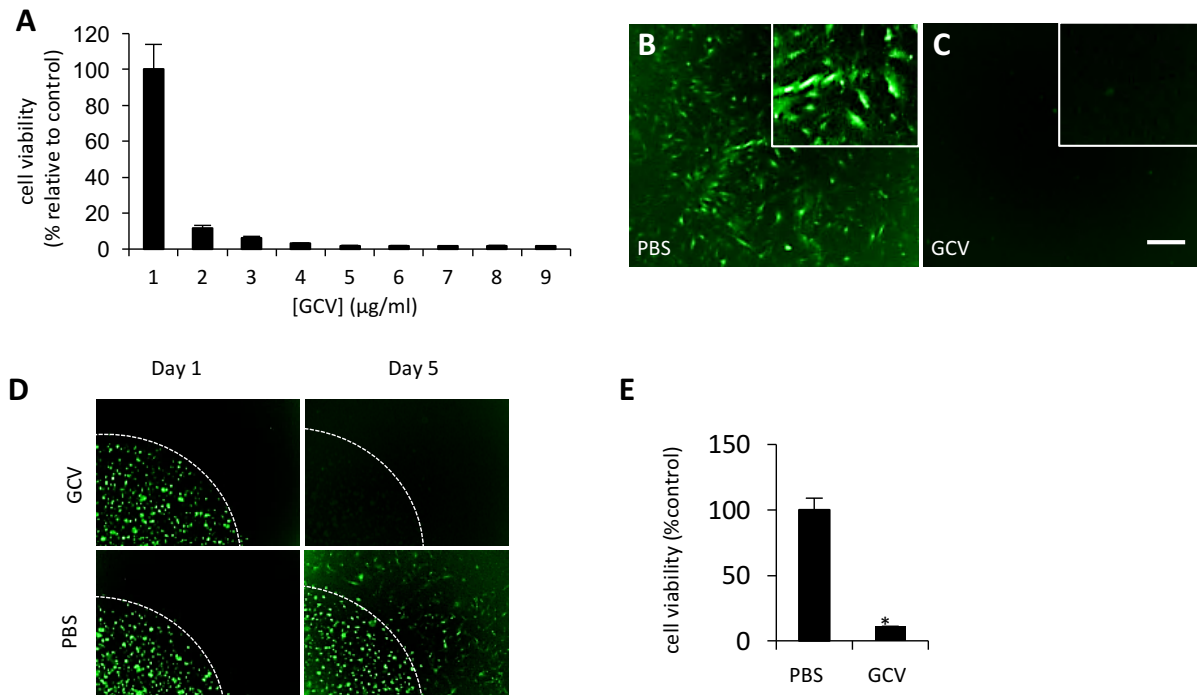

**Supplemental Figure 8. MSCs co-expressing HSV-TK and mIFN $\beta$  can be selectively eliminated *in vitro***

(A) Plot showing MSC-mIFN $\beta$ -TK viability 72 hrs post-GCV treatment (0-80  $\mu\text{g/ml}$ ) relative to non-TK-expressing MSC control. (B-C) Fluorescent micrographs showing MSC-mIFN $\beta$ -TK cells treated for 72 hrs with (B) PBS or (C) 10  $\mu\text{g/ml}$  GCV. Inset shows cells at  $\times 10$  magnification. Scale bar, 200  $\mu\text{m}$  (D) Fluorescence micrographs showing  $1 \times 10^5$  MSC-mIFN $\beta$ -TK cells encapsulated in sECM (green) and treated with PBS or 10  $\mu\text{g/ml}$  GCV for 5 days; edge of sECM drop demarcated by dashed white line. (E) Cell viability was assessed.  $P < 0.001$  compared to PBS-treated control.
