# Supplementary material for: Tumor Resection Recruits Effector T Cells and Boosts Therapeutic Efficacy of Encapsulated Stem Cells Expressing IFNβ in Glioblastomas
Source: Oxford University Press journal article supplement (doi:10.1158/1078-0432.ccr-17-0077), 2017-09-14
Supplement: 10780432ccr170077-sup-177065_3_supp_4230793_hv5mq2.pdf [file 10780432ccr170077-sup-177065_3_supp_4230793_hv5mq2.pdf]

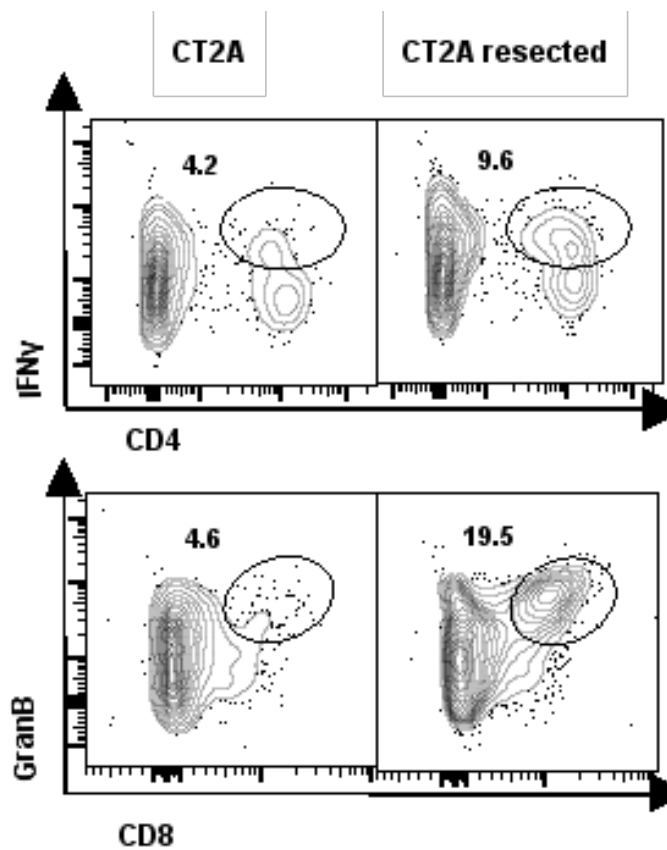

**Supplemental Figure 4. Tumor resection enhances infiltration of effector CD4<sup>+</sup> and CD8<sup>+</sup> T cells**  
 Flow cytometry analysis of effector CD4<sup>+</sup> and CD8<sup>+</sup> T cells in intact tumor versus 5 days post-tumor resected group (n=3 mice/group). Representative flow cytometric plots showing IFNγ<sup>+</sup>CD4<sup>+</sup> population and CD8<sup>+</sup>GranzymeB<sup>+</sup> population in CD45<sup>+</sup>CD11b<sup>-</sup> gated events.
